# Supplementary material for: Long noncoding RNA PVT1 promotes breast cancer proliferation and metastasis by binding miR-128-3p and UPF1
Source: Springer Nature journal article supplement (doi:10.1186/s13058-021-01491-y), 2021-12-18
Supplement: MOESM1 [file 19967734]

## Additional file 1

### Additional table:

Additional table: Association between PVT1 expression and the subtypes of breast cancer patients (all female)

| Characteristics | Case (n=80) | Expression of PVT1 |             | P value |
|-----------------|-------------|--------------------|-------------|---------|
|                 |             | Low (n=40)         | High (n=40) |         |
| subtype         |             |                    |             |         |
| Luminal A       | 29          | 17                 | 12          | 1.000   |
| Luminal B       | 19          | 8                  | 11          |         |
| Her-2+          | 17          | 8                  | 9           |         |
| Basal-like      | 15          | 7                  | 8           |         |

**Additional figure:**

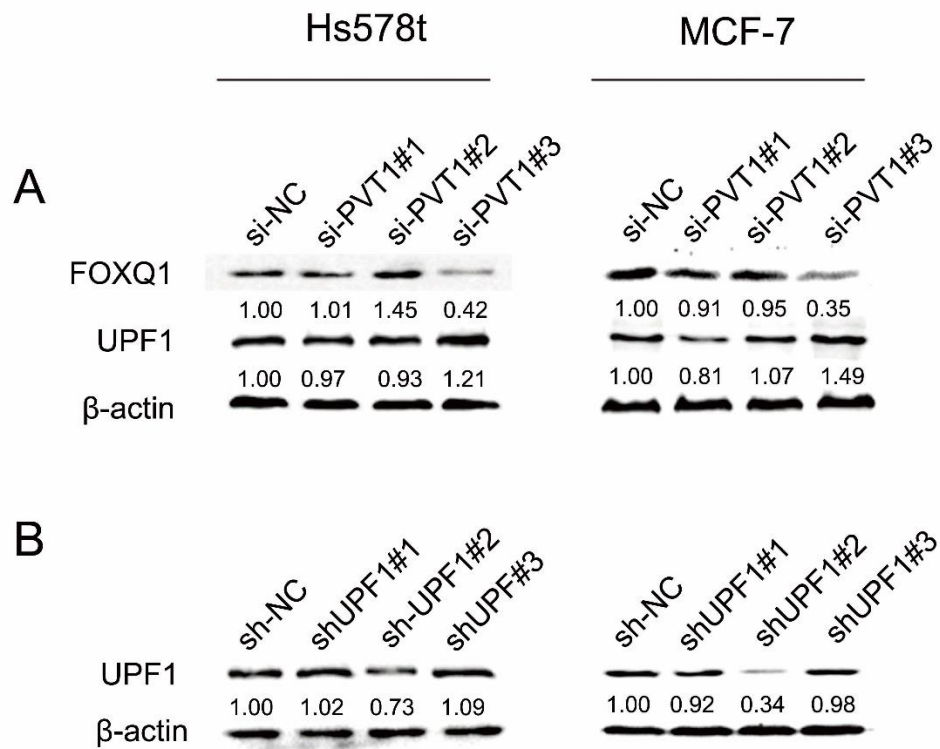

**Additional figure: si-PVT1 and sh-UPF1 knockdown efficiency in Hs578t and MCF-7 cells**

(A) Western blot assays for FOXQ1 and UPF1 in Hs578t and MCF-7 cells. (B) Western blot assays for UPF1 in Hs578t and MCF-7 cells.
